# Supplementary material
Source: Springer Nature journal article supplement (https://www.springermedizin.de/resource/supplementary/12885_2012_3819_MOESM10_ESM.pdf/9464306)

**A**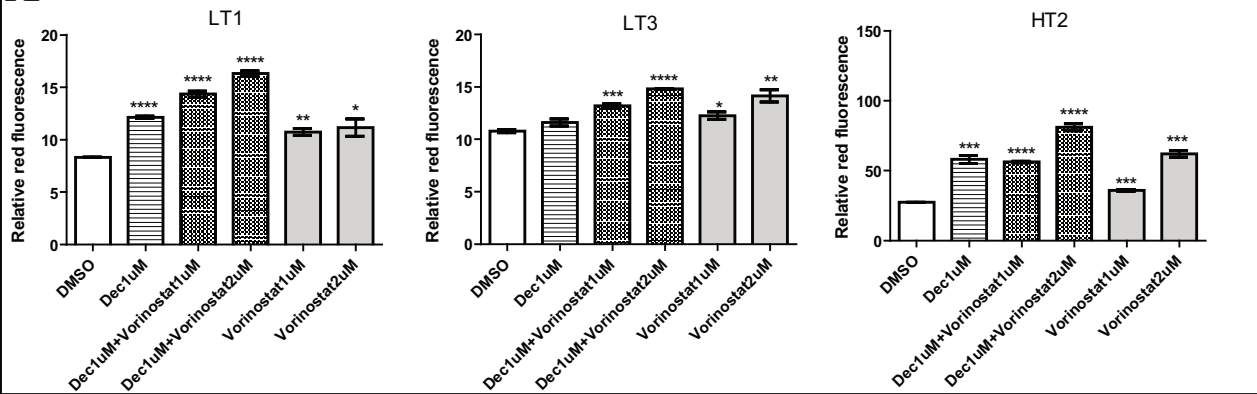**B**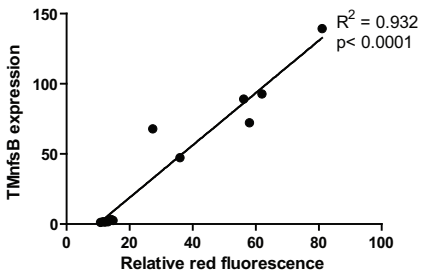**C**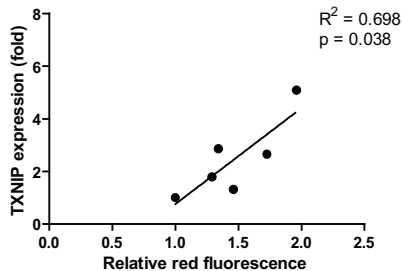**D**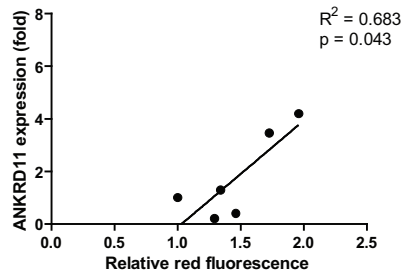

Supplement: MOESM10 [file 9464306]
